# Supplementary material for: Disruption of Selenium Handling During Puberty Causes Sex-Specific Neurological Impairments in Mice
Source: MDPI journal article supplement (doi:10.3390/antiox8040110), 2019-04-24
Supplement: s1 [file s1]

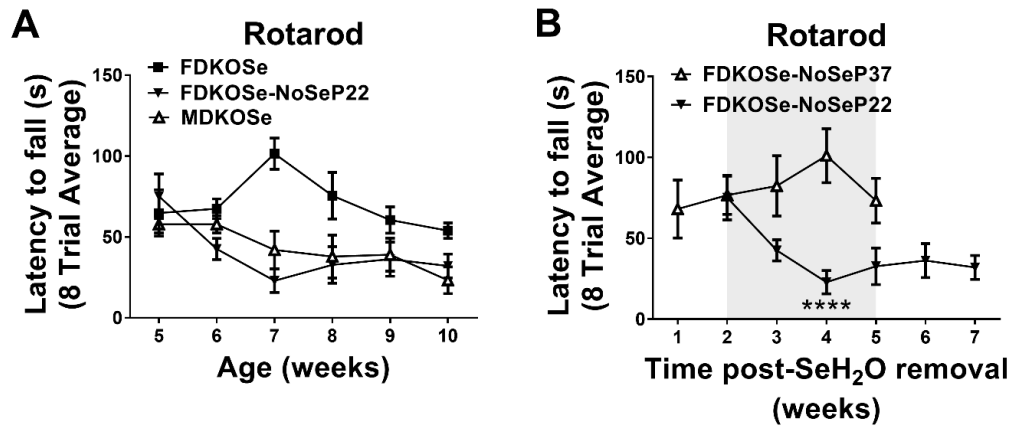

**Figure S1.** Comparison of female double knockout mice supplemented with Se until P22 (FDKOSe)-NoSeP22 rotarod performance to male double knockout mice supplemented with Se (MDKOSe) and FDKOSe-NoSeP37 mice. **(A)** SeH<sub>2</sub>O (supplemental Se water) removal from FDKOSe mice reduces rotarod performance to a level comparable to MDKOSe mice. **(B)** Comparison of FDKOSe mice with SeH<sub>2</sub>O removed at P22 and P37 according to the number of weeks post-SeH<sub>2</sub>O removal (x-axis). Grey shading shows timepoints at which data was available for both groups. These data were compared via two-way ANOVA: Interaction  $F_{(3,35)} = 2.97$   $p < 0.05$ , Time of SeH<sub>2</sub>O removal  $F_{(1,35)} = 1.085$   $p < 0.0001$ , Weeks NS; FDKOSe-NoSeP37  $n = 4$ , and FDKOSe-NoSeP22  $n = 6$ . Bonferroni's multiple comparisons test: \*\*\*\* $p < 0.0001$  at 4 weeks post SeH<sub>2</sub>O removal. C57/BL6 mice aged P70 were used. All values reported as Mean  $\pm$  SEM.

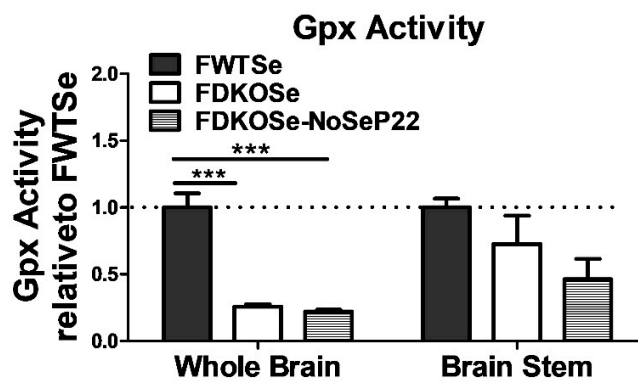

**Figure S2.** Effect of SeH<sub>2</sub>O (supplemental Se water) withdrawal on glutathione peroxidase (Gpx) activity in female double knockout mice supplemented with Se (FDKOSe). Gpx activity in whole brain and brain stem relative to female wild-type mice supplemented with Se (FWTSe) values. One-way ANOVA: Whole Brain  $p < 0.0001$ ; Brain Stem NS  $p = 0.0820$ ; Bonferroni's multiple comparisons test: \*\*\* $p < 0.0005$ ,  $n = 3$  to 4 in triplicates. Female C57/BL6 mice aged P70 were used. Data presented as mean  $\pm$  SEM.
